# Supplementary material for: Training Packages and Patient Management Tools for Healthcare Staff Working with Small, Nutritionally At-Risk Infants Aged under 6 Months: A Mixed-Methods Study
Source: MDPI journal article supplement (doi:10.3390/children10091496), 2023-09-01
Supplement: s1 [file s1]

Table S1 - Identified Trainings addressing mothers and at-risk infants &lt;6 months with extended summary of curriculum

| Curriculum                              | WHO                               |                                             |                                 |                                        |        |                               |                                    |               | ENN    | LSHTM                           | SC             | ACF                  | Holt International                                                              | CARE, URC/CHS    |
|-----------------------------------------|-----------------------------------|---------------------------------------------|---------------------------------|----------------------------------------|--------|-------------------------------|------------------------------------|---------------|--------|---------------------------------|----------------|----------------------|---------------------------------------------------------------------------------|------------------|
|                                         | Nutrition Works/EN/ IASC/ USAID   | UNICEF                                      | UNICEF                          | UNICEF                                 | UNICEF | UNICEF/LINKAGE/ IBFAN/ENN     | UNICEF/ UNAIDS                     |               |        |                                 |                |                      |                                                                                 |                  |
|                                         | Harmonised Training Package (HTP) | Breastfeeding Counselling a Training Course | Community IYCF Counselling Pack | IYCF counselling: An integrated course | IMCI   | Infant feeding in emergencies | HIV and Infant Feeding Counselling | Think Healthy | C-MAMI | Getting to know cerebral palsy* | IYCF-E Toolkit | Baby friendly Spaces | Feeding and Positioning Manual: Guidelines for Working with Babies and Children | IYCF Counselling |
| <b>Infant</b>                           |                                   |                                             |                                 |                                        |        |                               |                                    |               |        |                                 |                |                      |                                                                                 |                  |
| Triage                                  |                                   |                                             |                                 |                                        |        |                               |                                    |               | x      |                                 |                | x                    |                                                                                 |                  |
| Feeding Assessment                      | x                                 | x                                           | x                               | x                                      | x      | x                             |                                    |               | x      | x                               | x              | x                    |                                                                                 | x                |
| Anthropometric / Nutritional Assessment |                                   |                                             |                                 |                                        | x      |                               |                                    |               | x      |                                 |                | x                    |                                                                                 |                  |
| Assessing Illness                       |                                   |                                             |                                 |                                        | x      | x                             |                                    |               | x      |                                 |                |                      |                                                                                 |                  |
| Growth Monitoring                       |                                   | x                                           | x                               | x                                      |        | x                             |                                    |               | x      |                                 | x              | x                    |                                                                                 | x                |
| Identify Treatment                      |                                   |                                             |                                 |                                        | x      |                               |                                    |               | x      |                                 |                |                      |                                                                                 |                  |
| Kangaroo Care                           |                                   |                                             | x                               |                                        |        | x                             |                                    |               |        |                                 | x              | x                    |                                                                                 |                  |
| <b>The Sick Child</b>                   |                                   | x                                           |                                 |                                        | x      |                               |                                    |               |        |                                 |                |                      |                                                                                 | x                |
| Diarrhoea                               |                                   | x                                           |                                 |                                        | x      |                               |                                    |               |        |                                 |                |                      |                                                                                 | x                |
| SAM                                     |                                   |                                             |                                 |                                        | x      | x                             |                                    |               | x      |                                 |                |                      |                                                                                 |                  |
| <b>Breastfeeding</b>                    | x                                 | x                                           | x                               | x                                      | x      | x                             | x                                  |               | x      | x                               | x              | x                    | x                                                                               | x                |
| Why it is important                     |                                   | x                                           |                                 | x                                      | x      | x                             | x                                  |               |        |                                 | x              | x                    | x                                                                               | x                |
| Best Practice                           |                                   | x                                           |                                 | x                                      |        | x                             |                                    |               |        |                                 | x              | x                    |                                                                                 | x                |
| How it works                            |                                   | x                                           | x                               | x                                      |        | x                             | x                                  |               |        |                                 | x              | x                    | x                                                                               | x                |
| Difficulties                            |                                   | x                                           | x                               | x                                      | x      | x                             |                                    |               | x      | x                               | x              | x                    |                                                                                 | x                |
| Risk of not breastfeeding               |                                   | x                                           | x                               |                                        |        | x                             | x                                  |               |        |                                 |                |                      |                                                                                 |                  |
| IYCF                                    | x                                 | x                                           | x                               | x                                      |        | x                             |                                    |               |        |                                 | x              | x                    |                                                                                 | x                |
| Artificial feeding                      | x                                 | x                                           |                                 |                                        |        | x                             |                                    |               |        |                                 | x              | x                    | x                                                                               |                  |
| BF Beliefs                              |                                   |                                             | x                               |                                        |        |                               |                                    |               |        |                                 | x              | x                    |                                                                                 | x                |

|                                         |   |   |   |   |   |   |   |   |   |   |   |   |   |   |
|-----------------------------------------|---|---|---|---|---|---|---|---|---|---|---|---|---|---|
| BF Support                              |   | x | x | x |   | x | x |   |   |   | x | x |   | x |
| BF Counselling                          |   | x | x | x | x |   |   |   |   |   | x | x |   | x |
| Expressing Breastmilk                   |   |   |   | x |   |   |   |   |   |   | x | x |   | x |
| Behaviour Change                        |   |   | x |   |   |   |   |   |   |   | x | x |   | x |
| Relactation                             |   | x |   |   |   | x |   |   | x |   | x | x |   |   |
| How to breastfeed while working         |   |   |   |   |   |   | x |   |   |   |   |   |   |   |
| <b>Mother</b>                           |   |   |   |   |   |   |   |   |   |   |   |   |   |   |
| Maternal health assessment              |   |   |   |   |   |   |   | x | x |   | x | x |   | x |
| Women's nutrition, health and fertility |   |   |   |   | x | x |   | x |   |   | x | x |   | x |
| Counselling the mother                  |   |   |   |   | x | x |   | x |   |   | x | x |   | x |
| Preparing for the baby / pregnancy      |   |   |   |   |   |   |   | x |   |   |   |   |   |   |
| <b>HIV and Infant Feeding</b>           |   | x | x | x |   | x | x |   | x |   | x | x | x | x |
| Risk of mother child transmission (HIV) |   | x | x | x |   | x | x |   |   |   | x | x |   | x |
| decision making on feeding practice     |   |   | x | x |   | x | x |   |   |   | x |   |   |   |
| <b>Disability</b>                       |   |   |   |   |   |   |   |   |   | x |   |   | x |   |
| Feeding difficulties                    |   |   |   |   |   |   |   |   |   | x |   |   | x | x |
| <b>Counsellors</b>                      |   |   |   |   |   |   |   |   |   |   |   |   |   |   |
| Counselling Skills                      |   | x | x | x | x | x | x | x |   | x | x | x |   | x |
| Communication Skills                    |   | x | x | x | x | x |   | x |   |   | x | x |   | x |
| BCC                                     |   |   |   | x |   |   |   | x |   |   | x | x |   | x |
| <b>Other</b>                            |   |   |   |   |   |   |   |   |   |   |   |   |   |   |
| Management of Artificial                | x |   |   | x |   | x |   |   |   |   | x | x |   |   |

|                                                                 |   |   |  |   |  |   |  |  |  |  |   |   |  |   |
|-----------------------------------------------------------------|---|---|--|---|--|---|--|--|--|--|---|---|--|---|
| feeding/<br>donations                                           |   |   |  |   |  |   |  |  |  |  |   |   |  |   |
| Emergency<br>Preparedness                                       | x |   |  |   |  | x |  |  |  |  | x | x |  |   |
| Policies and<br>Guidelines for<br>appropriate<br>infant feeding | x |   |  | x |  |   |  |  |  |  | x | x |  | x |
| Food Hygiene                                                    |   | x |  |   |  | x |  |  |  |  | x | x |  |   |

Table S2 - Comparing logistics of identified Trainings addressing mothers and at-risk infants <6 months

| Curriculum                                  | WHO                                                                 |                                               |                                         |                                                                                     |                                                             |                                 |                                                                                |                    | ENN                                        | LSHTM                                                             | SC                                                                                               | ACF                                                                                                                | Holt International                                                            | CARE, URC/CHS                                                                   |
|---------------------------------------------|---------------------------------------------------------------------|-----------------------------------------------|-----------------------------------------|-------------------------------------------------------------------------------------|-------------------------------------------------------------|---------------------------------|--------------------------------------------------------------------------------|--------------------|--------------------------------------------|-------------------------------------------------------------------|--------------------------------------------------------------------------------------------------|--------------------------------------------------------------------------------------------------------------------|-------------------------------------------------------------------------------|---------------------------------------------------------------------------------|
|                                             | Nutrition Works/EN/ IASC/ USAID                                     | UNICEF                                        | UNICEF                                  | UNICEF                                                                              | UNICEF                                                      | UNICEF/LINK AGE/ IBFAN/ENN      | UNICEF/ UNAIDS                                                                 |                    |                                            |                                                                   |                                                                                                  |                                                                                                                    |                                                                               |                                                                                 |
|                                             | Harmonised Training Package (HTP)                                   | Breastfeeding Counselling a Training Course   | Community IYCF Counselling Pack         | IYCF counselling g: An integrated course                                            | IMCI                                                        | Infant feeding in emergencies   | HIV and Infant Feeding Counselling                                             | Think Healthy      | C-MAMI                                     | Getting to know cerebral palsy*                                   | IYCF-E Toolkit                                                                                   | Baby friendly Spaces                                                                                               | Feeding + Positioning Manual: Guidelines for Working with Babies and Children | IYCF Counselling                                                                |
| <b>Year published</b>                       | Vol. 2, 2011                                                        | 1993                                          | 2010                                    | 2006                                                                                | 1997                                                        | Module 2, Vol. 1.1, 2001        | 2000                                                                           | 2015               | v.2 2018                                   |                                                                   | V. 2.1 2010                                                                                      | 2014                                                                                                               |                                                                               | 2007                                                                            |
| <b>Who is the training aimed at?</b>        | Trainers in the Nutrition in Emergencies sector                     | Trainers training Health workers              | CHW other CW, primary health care Staff | Lay Counsellors, CHW, PMTCT Counsellors, Nurses, Clinicians at first referral level | Doctors, Nurses, Health workers                             | Health and Nutrition Workers    | Guide to train Trainers, CHW working with HIV+ mothers and babies              | CHW                | Health Worker                              | facilitator , parents, caregivers and persons with cerebral palsy | Emergency relief Staff, technical Staff, Nutrition Advisors, Coordinators and programme managers | Psychologists, Psychosocial workers, Animators , Lactation Counsellors, Midwives, Nurses, Community health workers | Caregivers                                                                    | low literacy, community-level Infant and Young Child Feeding (IYCF) Counsellors |
| <b>What target population is addressed?</b> | Infants and children affected by emergencies (no age specification) | Women and children after the perinatal period | infants 0-24 months                     | Mothers with Infants 0-24 months                                                    | infants 1 week up to 2 months / children 2 months - 5 years | Mothers / Caregivers of Infants | Mothers and babies (no age specification) in areas with high prevalence of HIV | Mothers of infants | at-risk Mothers and Infants under 6 months | Children that suffer from cerebral palsy                          | Mothers and infants from 0-60 months                                                             | Pregnant and Lactating Women and their Children                                                                    | Infants 0-12 months                                                           | Mothers and Infants 0-23 months                                                 |
| <b>What setting is</b>                      | In emergencies                                                      | In the Community                              | In the community                        | /                                                                                   | Inpatient and                                               | Emergency                       | In the community                                                               | In the community   | In the community                           | In the community                                                  | In Emergencies                                                                                   | In Emergencies                                                                                                     | /                                                                             | Low Resource Settings                                                           |

|                                                                  |                                                                                                                                |                                                                                                                     |                                                                                                                                              |                                                                                                                                             |                                                                                                                    |                                             |                                                                                                    |                                    |                                                                |                                                          |                                                                                                                       |                                        |                                                                           |                                                                                                                                        |
|------------------------------------------------------------------|--------------------------------------------------------------------------------------------------------------------------------|---------------------------------------------------------------------------------------------------------------------|----------------------------------------------------------------------------------------------------------------------------------------------|---------------------------------------------------------------------------------------------------------------------------------------------|--------------------------------------------------------------------------------------------------------------------|---------------------------------------------|----------------------------------------------------------------------------------------------------|------------------------------------|----------------------------------------------------------------|----------------------------------------------------------|-----------------------------------------------------------------------------------------------------------------------|----------------------------------------|---------------------------------------------------------------------------|----------------------------------------------------------------------------------------------------------------------------------------|
| the training aimed at?                                           |                                                                                                                                |                                                                                                                     |                                                                                                                                              |                                                                                                                                             | Outpatient Care                                                                                                    |                                             |                                                                                                    |                                    |                                                                |                                                          |                                                                                                                       |                                        |                                                                           |                                                                                                                                        |
| How long is the training (how many hours)?                       | /                                                                                                                              | 40 h                                                                                                                | 20 sessions x 1.4h / 5 Days                                                                                                                  | 5 days                                                                                                                                      | 11-day course                                                                                                      | /                                           | 16 Sessions 3-day course approx. 6 contact h each day (17h 45min)                                  | min 5 days target duration 10 days | /                                                              | dependent on the setting, can be comprised into 2-3 days | Dependent on setting, no specification                                                                                | Dependent on setting, no specification | /                                                                         | 5 Days                                                                                                                                 |
| How is the training delivered?                                   | Resource package that can be used by trainers during process of course development. Not a ready to use training course itself. | Lectures, demonstrations, small group discussions, reading, role-play, exercise                                     | From Facilitator                                                                                                                             | Classes and Practice                                                                                                                        | classes and clinical sessions                                                                                      | Classes, Case Studies                       | contact                                                                                            | from trainers to CHW               | Tool for health workers                                        | Participatory training                                   | e-Training, Contact                                                                                                   | Contact                                | Manual is intended to be used by caregivers as guide on feeding practices | Variety of Training Methods, Counselling, Material, Visual Aids, demonstrations, Group discussions, Case Studies, Role plays, Practice |
| Are there any toolkits provided? / Accompanying course material? | /                                                                                                                              | Participants manual Answer sheet Forms and Checklist for clinical practice and counselling, Story cards, Videotapes | IYCF counselling package, Facilitator Guide, Training Aid, Participant Handouts and, monitoring tools, IYCF counselling Cards, Key messages, | Directors and Trainers, Guide, Participants Manual, Follow-up Guidelines, Slides presentation, Answer Sheets, Forms Checklists, Story Cards | Director and Facilitator Guide, outpatient clinical practice Guide, inpatient, Comprises 15 self-learning Booklets | Manual, Overhead Figures, Presenters Notes, | Directors Guide, Trainers Guide, Overhead Transparencies, Participants manual Feeding options card | reference manual Health calendar   | Counselling booklets counselling cards, C-MAMI programme cards | /                                                        | Guide on common BF myths, Assessment Tools, Guides, Implementation Tools, Counselling Cards, Course Materials, Videos | /                                      | /                                                                         | Counselling cards, Message Booklet, Trainers Guide, no dependence on slides or media projection                                        |

|                                                           |                                                                                                          |                                                  |                                                                                               |                                               |         |         |         |                                            |                                                                   |                                                                                      |                               |                                                                                                                  |         |                                                                                          |
|-----------------------------------------------------------|----------------------------------------------------------------------------------------------------------|--------------------------------------------------|-----------------------------------------------------------------------------------------------|-----------------------------------------------|---------|---------|---------|--------------------------------------------|-------------------------------------------------------------------|--------------------------------------------------------------------------------------|-------------------------------|------------------------------------------------------------------------------------------------------------------|---------|------------------------------------------------------------------------------------------|
|                                                           |                                                                                                          |                                                  | Booklet,<br>take<br>home<br>Brochur<br>es,<br>Planning<br>-<br>Adaptati<br>on guide           |                                               |         |         |         |                                            |                                                                   |                                                                                      |                               |                                                                                                                  |         |                                                                                          |
| <b>Does the training include an implementation guide?</b> | Summarize<br>s topics<br>that must<br>be<br>considered<br>when<br>implement<br>ing, such<br>as staffing, | Directors<br>Guide                               | Includes<br>a<br>planning<br>Guide                                                            | Yes                                           |         | No      |         |                                            |                                                                   |                                                                                      |                               | Yes                                                                                                              |         | Includes<br>Clear<br>instructions<br>for<br>facilitator<br>on training<br>delivery       |
| <b>Does the Training include a Referral Guide</b>         | Mentions<br>to<br>establish<br>referral to<br>skilled IYCF<br>assistance                                 | Covers signs<br>of when<br>referral is<br>needed | Covers signs of<br>when<br>referral<br>is<br>needed                                           | Yes                                           |         | Yes     |         |                                            | referral<br>Guide<br>based on<br>sympto<br>ms, and<br>WFA,<br>WFL |                                                                                      |                               | Yes                                                                                                              |         | Yes                                                                                      |
| <b>Is an end evaluation included?</b>                     | Module on<br>monitoring<br>and<br>evaluation                                                             | /                                                | Post<br>training<br>follow<br>ups by<br>facilitato<br>r max. 3<br>months<br>after<br>training | Follow up<br>Guideline<br>s after<br>Training | /       | No      |         | /                                          | /                                                                 | short<br>section<br>about<br>monitori<br>ng and<br>evaluatio<br>n of the<br>training | /                             | Monitorin<br>g and<br>Evaluation<br>process.<br>Tools for<br>measuring<br>outcome<br>and<br>impact<br>indicators | /       | evaluation<br>of<br>participants<br>knowledge<br>and<br>satisfaction<br>with<br>training |
| <b>Certificate successful completion</b>                  | /                                                                                                        | /                                                | /                                                                                             | /                                             | /       | /       |         | /                                          | /                                                                 | /                                                                                    | /                             | /                                                                                                                | /       | /                                                                                        |
| <b>Available languages</b>                                | English                                                                                                  | English,<br>French,<br>Russian                   | English                                                                                       | English,<br>Spanish,<br>Russian               | English | English | English | English,<br>French,<br>Spanish,<br>Turkish | English                                                           | English,<br>French,<br>Spanish                                                       | English,<br>French,<br>Arabic | English,<br>French,<br>Arabic                                                                                    | English | English                                                                                  |
